# Supplementary material for: Green Synthesis of Ag and Pd Nanospheres, Nanowires, and Nanorods Using Vitamin B2: Catalytic Polymerisation of Aniline and Pyrrole
Source: Hindawi journal article supplement (doi:10.1155/2008/782358), 2008-01-01
Supplement: f1 [file 782358.f1.doc]

**Supplementary Material Corrections to appear OnLine**

Green Synthesis of Ag and Pd Nanospheres, Nanowires and Nanorods Using Vitamin B2: Catalytic Polymerisation of Aniline and Pyrrole

Mallikarjuna N. Nadagouda and Rajender S. Varma*****

*Sustainable Technology Division, National Risk Management Research Laboratory, U.S. Environmental Protection Agency, 26 W. Martin Luther King Dr., MS 443, Cincinnati, Ohio 45268, USA.*

## *Fax: 513- 569-7677; Tel: 513-487-2701; E-mail: varma.rajender@epa.gov*

**
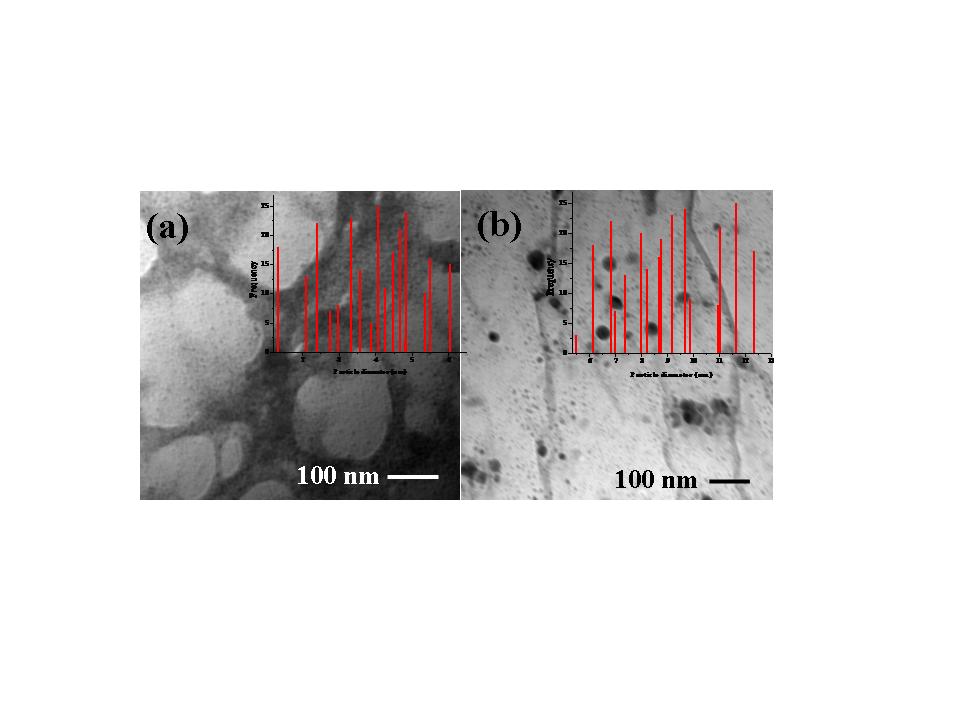
**

TEM micrographs of (a-b) Pd nanoparticles synthesized using vitamin B2 in acetic acid and NMP solvent, respectively. The inset shows particle size distribution.

Supplementary material shows

TEM micrographs of (a-b) Pd nanoparticles synthesized using vitamin B2 in acetic acid and NMP solvent, respectively, and the inset showing particle size distribution.
